# Supplementary material for: Facile sonochemical synthesis of pH-responsive copper nanoclusters for selective and sensitive detection of Pb2+ in living cells
Source: Royal Society of Chemistry journal article supplement (doi:10.1039/c5an00741k), 2015-01-01
Supplement: c5an00741k1.pdf [file c5an00741k1.pdf]

## Facile sonochemical synthesis of pH-responsive copper nanoclusters for selective and sensitive detection of Pb<sup>2+</sup> in living cells

Chuanxi Wang,\* Hao Cheng, Yijun Huang, Zhenzhu Xu, Huihui Lin and Chi Zhang\*

*China-Australia Joint Research Centre for Functional Molecular Materials, School of Chemical & Material Engineering, Jiangnan University, Wuxi 214122, P. R. China*

*E-mail address: chizhang@jiangnan.edu.cn; wangcx@jiangnan.edu.cn*

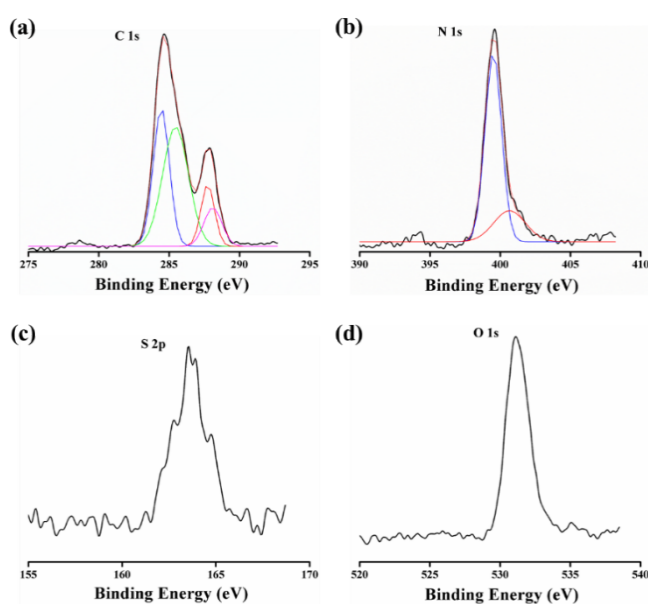

**Fig S1.** Typical XPS spectra of (a) C 1s; (b) N 1s; (c) S 2p and (d) O 1s involved in resultant GSH-CuNCs.

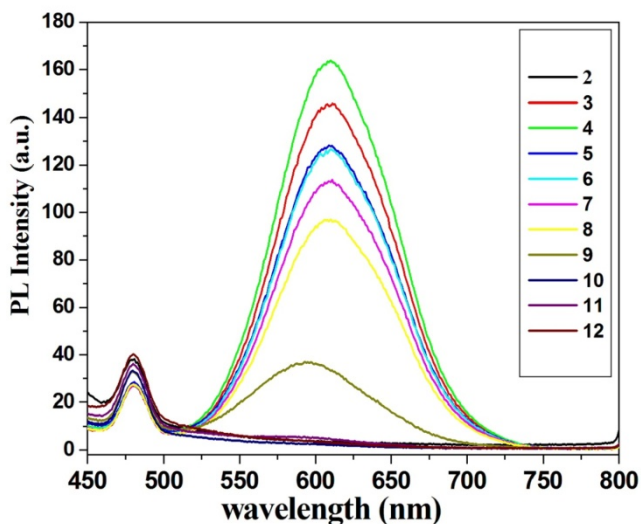

**Fig S2.** PL spectra of GSH–Cu NCs as a function of pH (ranging systematically from pH = 2-12).

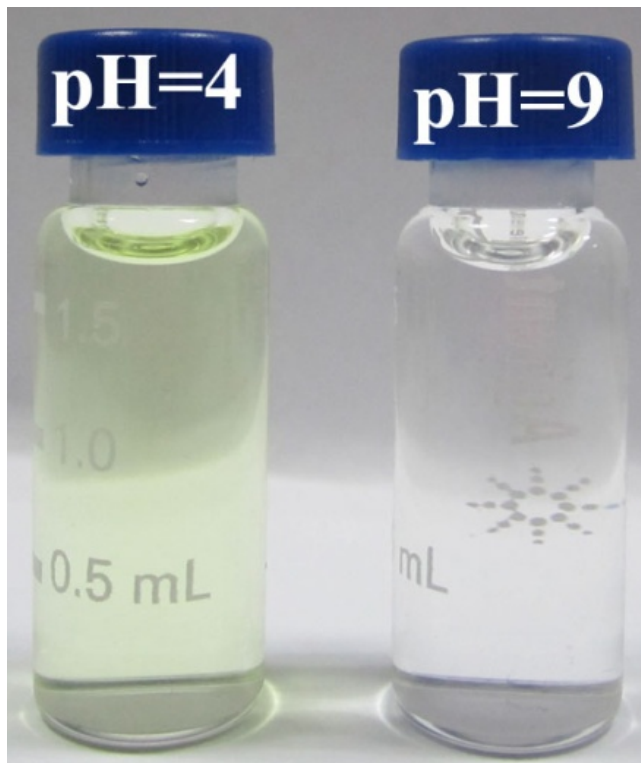

**Fig S3.** The photographs of resultant GSH–Cu NCs in the different pH conditions.

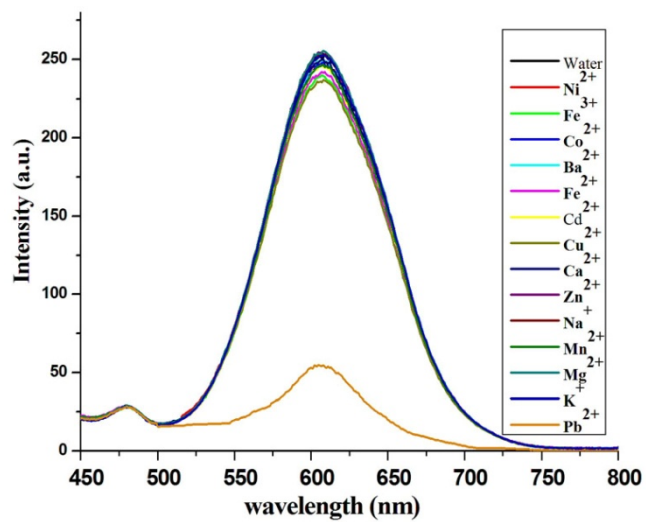

**Fig S4.** Fluorescence spectra of as-prepared GSH–Cu NCs in the presence of  $10^{-6}$  M metal ions.

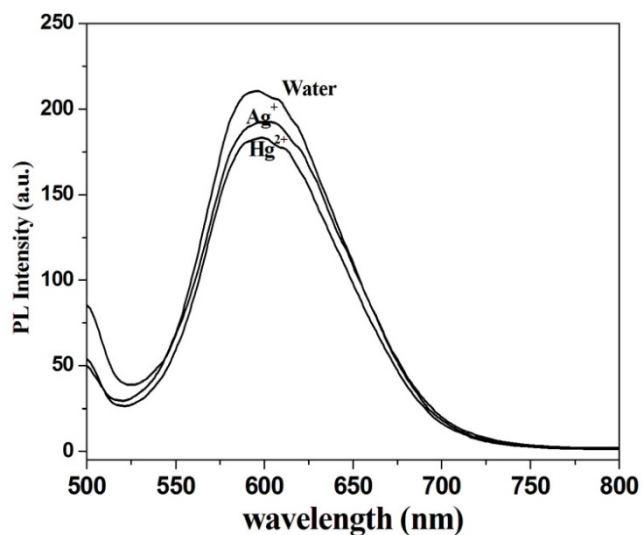

**Fig S5.** PL spectra of as-prepared GSH-Cu NCs in the presence of  $10^{-6}$  M Hg(II) and Ag(I) ions.

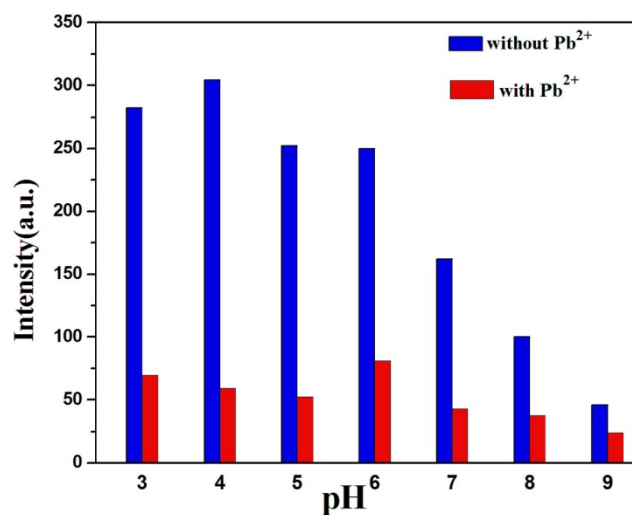

**Fig S6.** PL responses of as-prepared CuNCs in the absence (blue) and presence (red) of  $10^{-6}$  M Pb<sup>2+</sup> ions at different pH values.

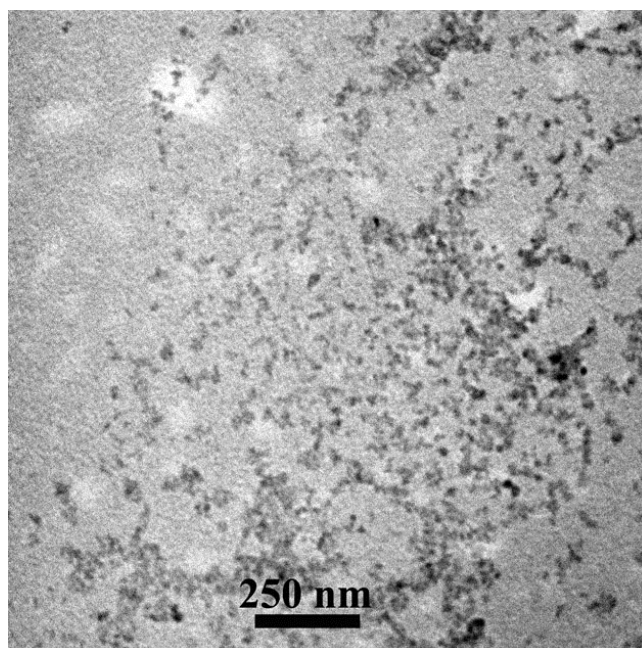

**Fig S7.** TEM image of the aggregated GSH-Cu NCs in the presence of  $\text{Pb}^{2+}$  ions
